# Supplementary material for: Wave energy attenuation in fields of colliding ice floes – Part 2: A laboratory case study
Source: Copernicus journal article supplement (doi:10.5194/tc-13-2901-2019), 2019-11-08
Supplement: Supplementary file [file tc-13-2901-2019-supplement-title-page.pdf › tc-13-2901-2019-supplement-title-page.pdf]

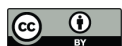

## *Supplement of*

# **Wave energy attenuation in fields of colliding ice floes – Part 2: A laboratory case study**

**Agnieszka Herman et al.**

*Correspondence to:* Agnieszka Herman (oceagah@ug.edu.pl)

- tc-13-2901-2019-supplement-title-page.pdf
- 2019\_hermanetal\_partB\_suppl.pdf
- SupplMovie1.mp4
- SupplMovie2.mp4

The copyright of individual parts of the supplement might differ from the CC BY 4.0 License.
